# Supplementary material for: Association of the T-cell regulatory gene CTLA4 with susceptibility to autoimmune disease
Source: Springer Nature journal article supplement (doi:10.1038/nature01621), 2003-04-30
Supplement: 41586_2003_BFnature01621_MOESM1_ESM.pdf [file 41586_2003_BFnature01621_MOESM1_ESM.pdf]

## Supplementary Information A.

### Genomics

The RPCI-1, 3, 4, and 5 human P1 artificial chromosome (PAC), the RPCI-11(Ref)<sup>1</sup> human, the RPCI-23(Ref)<sup>2</sup> mouse (B6) and the DIL-NOD bacterial artificial chromosome (BAC) libraries were obtained (Table A1). For all RPCI library information see <http://www.chori.org/bacpac/>. The DIL-NOD library was prepared from the NOD/MrkTac mouse at the Institute of Physical and Chemical Research (RIKEN Ibaraki, Japan) and is available for distribution from the JDRF/WT DIL. A number of probes were used to screen the libraries (data not shown). From the resulting positive clones six were sequenced (Table A1).

**Table A1:** Library screening and sequencing information.

| Library | Species/str | Probe                   | Sequenced clone name | Accession number             |
|---------|-------------|-------------------------|----------------------|------------------------------|
| RPCI-1  | Human       | (AT) <sub>n</sub> 3'UTR | 61E2                 | AF225900                     |
| RPCI-11 | Human       | (AT) <sub>n</sub> 3'UTR | 278L16               | AJ535716, AJ535717, AJ535718 |
| RPCI-1  | Human       | CD28                    | 219D7                | AF225899                     |
| RPCI-23 | Mouse B6    | Cd28                    | 157N11               | AL646054                     |
| RPCI-23 | Mouse B6    | Ctla4                   | 146J17               | AL663047                     |
| DIL-NOD | Mouse       | Ctla4/Icos              | 257N2                | AL596283                     |
|         | NOD         |                         |                      |                              |

The human and mouse sequences were assembled and used in database searches. The homology information was integrated into T1Dace, our in-house

adaptation of ACeDB<sup>3</sup> with the sequence, repeat information (RepeatMasker A.F.A. Smit and P. Green, unpublished, <http://www.genome.washington.edu/UWGC/analysistools/repeatmask.htm>), automatically annotated genes from EnsEMBL (<http://www.ensembl.org>), primers used for SNP harvesting, the identified SNPs, and SNPs from the public domain (dbSNP, TSC SNPs and HGBASE). The mouse and human genomic sequences were compared by constructing percent-identity plots (PIP)<sup>4</sup> (Figure A1). A view of this region using Generic Genome Browser (Gbrowse) (<http://www.gmod.org/ggb/>) is provided (Figure. A2). Only three functional genes exist in the region, *CD28*, *CTLA4* and *ICOS*, and three pseudogenes (a sequence with similarity to the ubiquinone-oxidoreductase MLRQ subunit gene, keratin, and nucleolar phosphoprotein). A sequence alignment of mouse and human sequence around the CT60 SNP revealed 66.1% homology from the poly-A signal to CT60 (ClustalW, 1.74, <http://bimas.dcrn.nih.gov/clustalw/clustalw.html>), (Figure A3).

**Fig. A1**

Figure A1. Percentage Identity Plot (PIP).

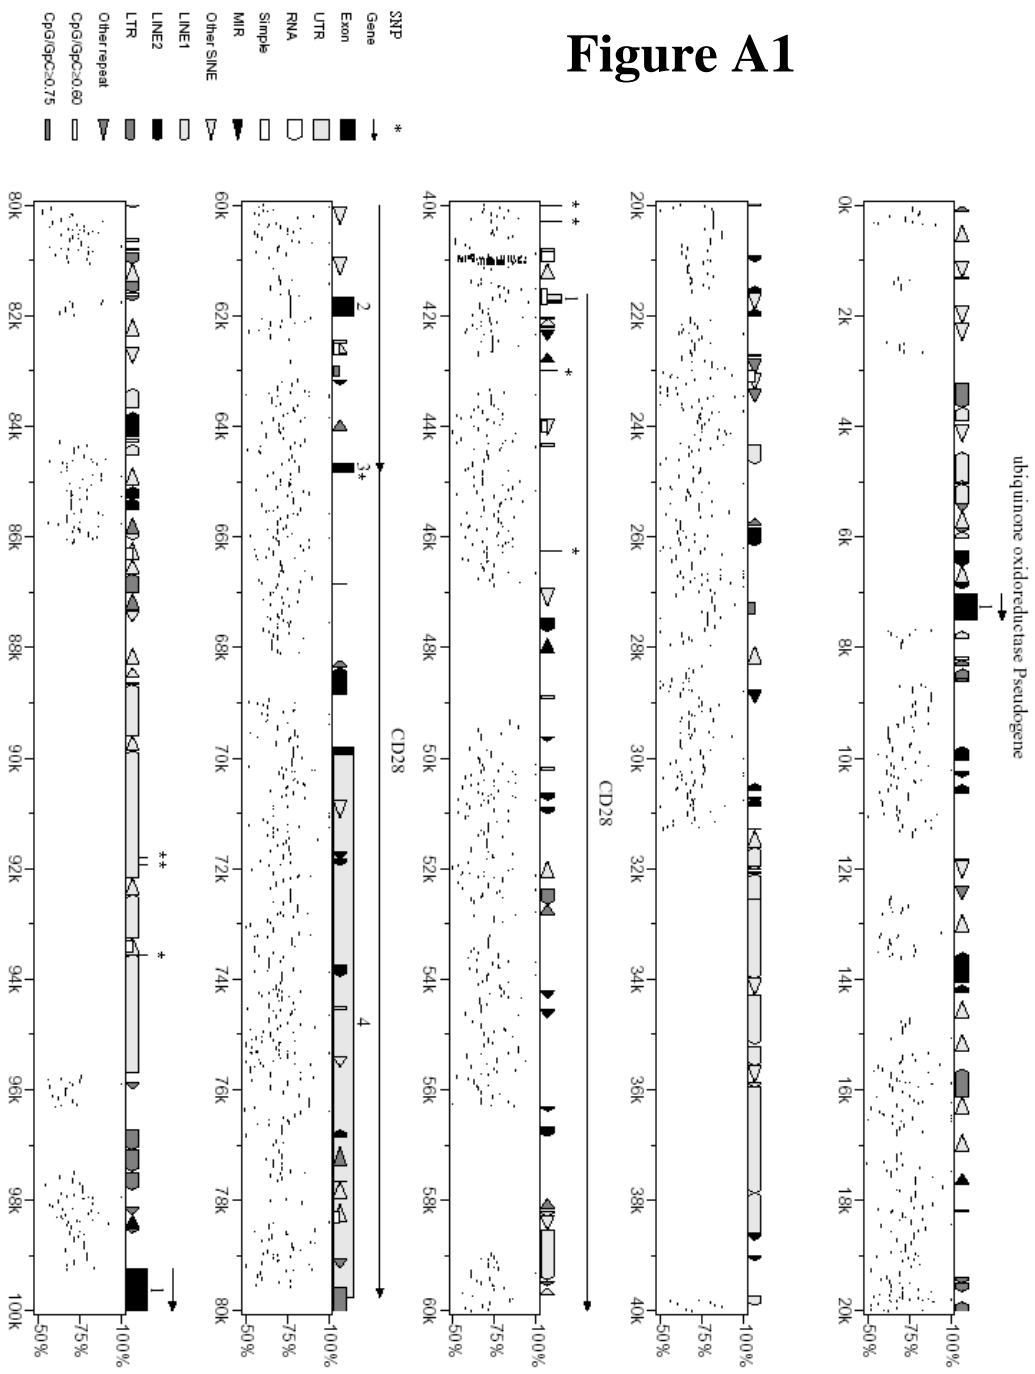

Figure A1

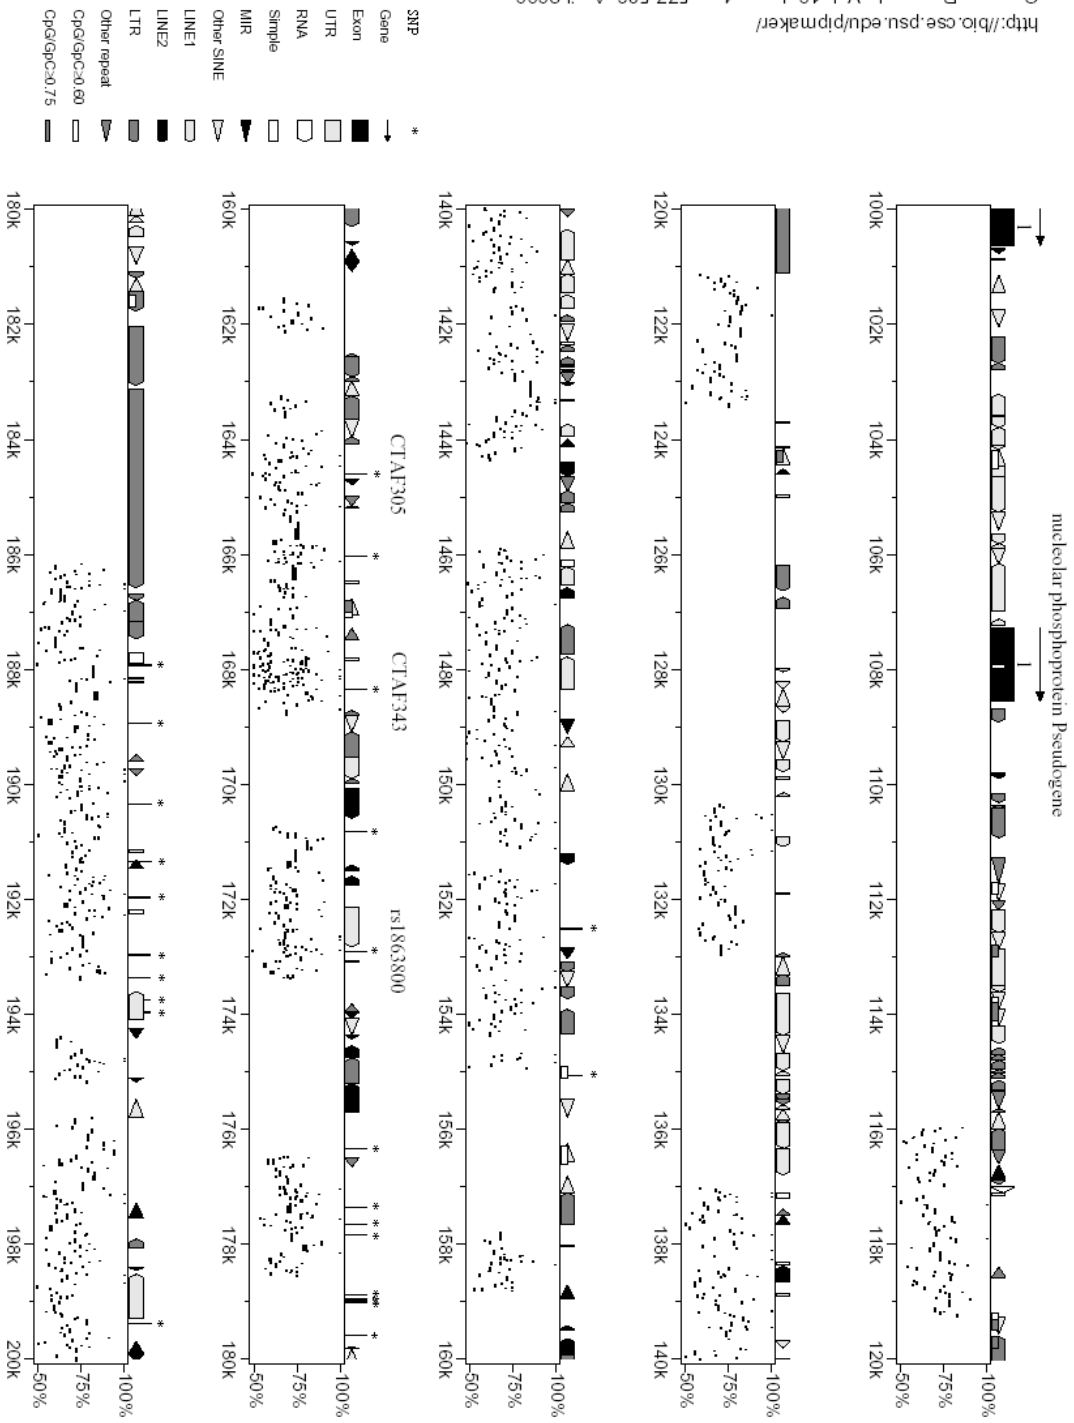

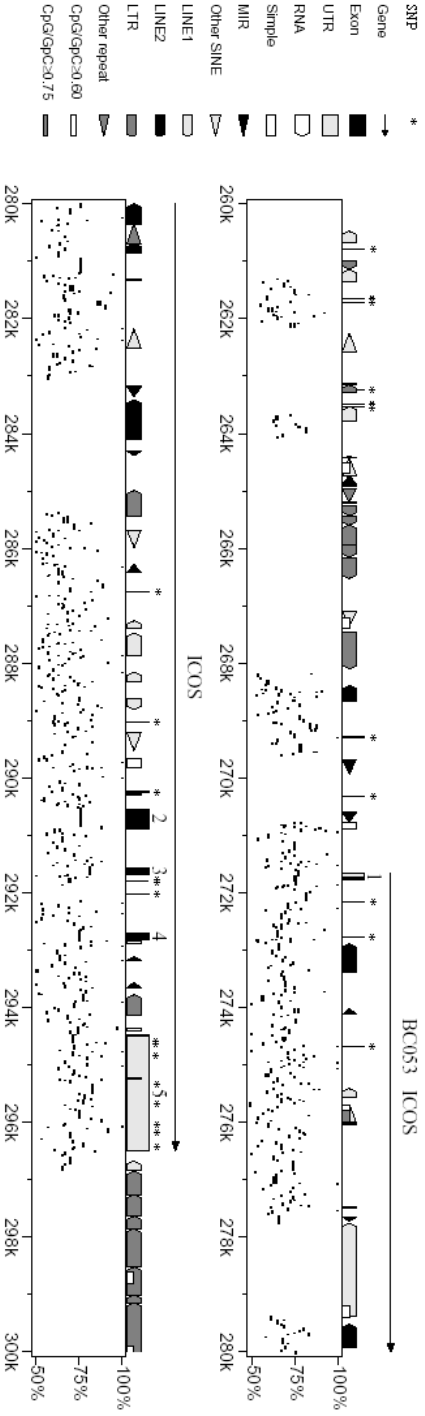

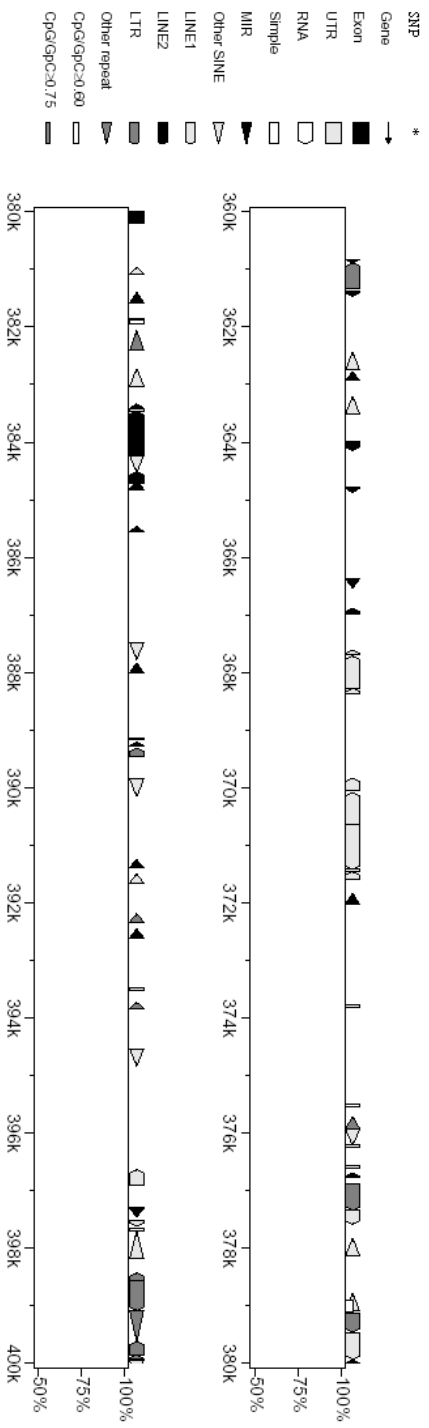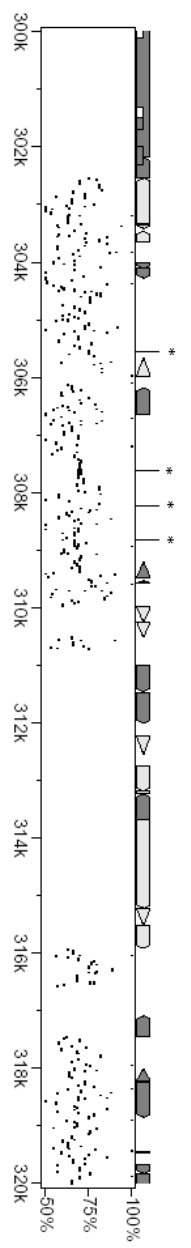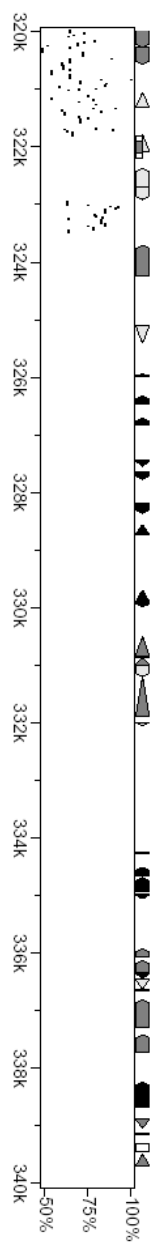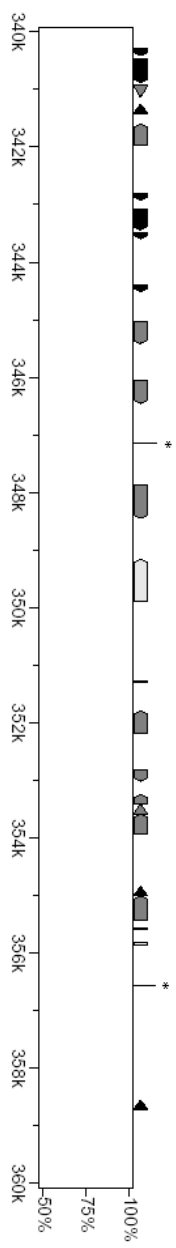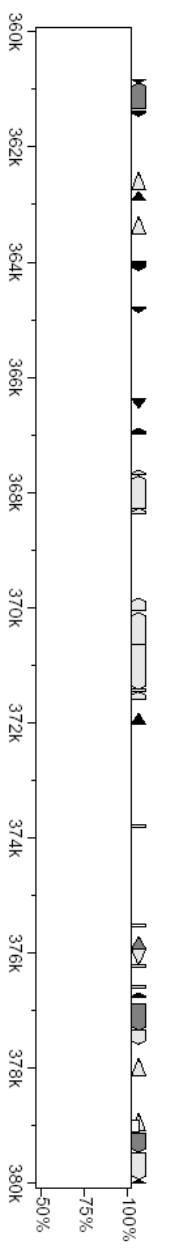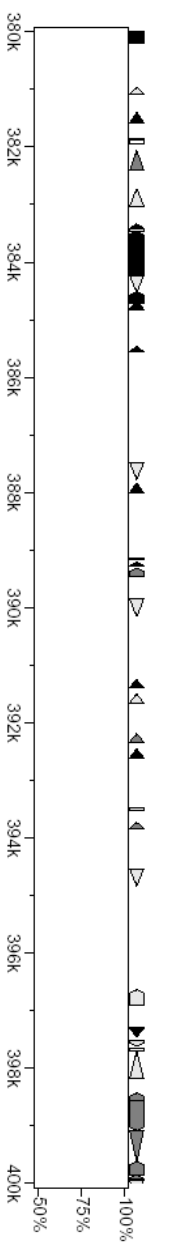

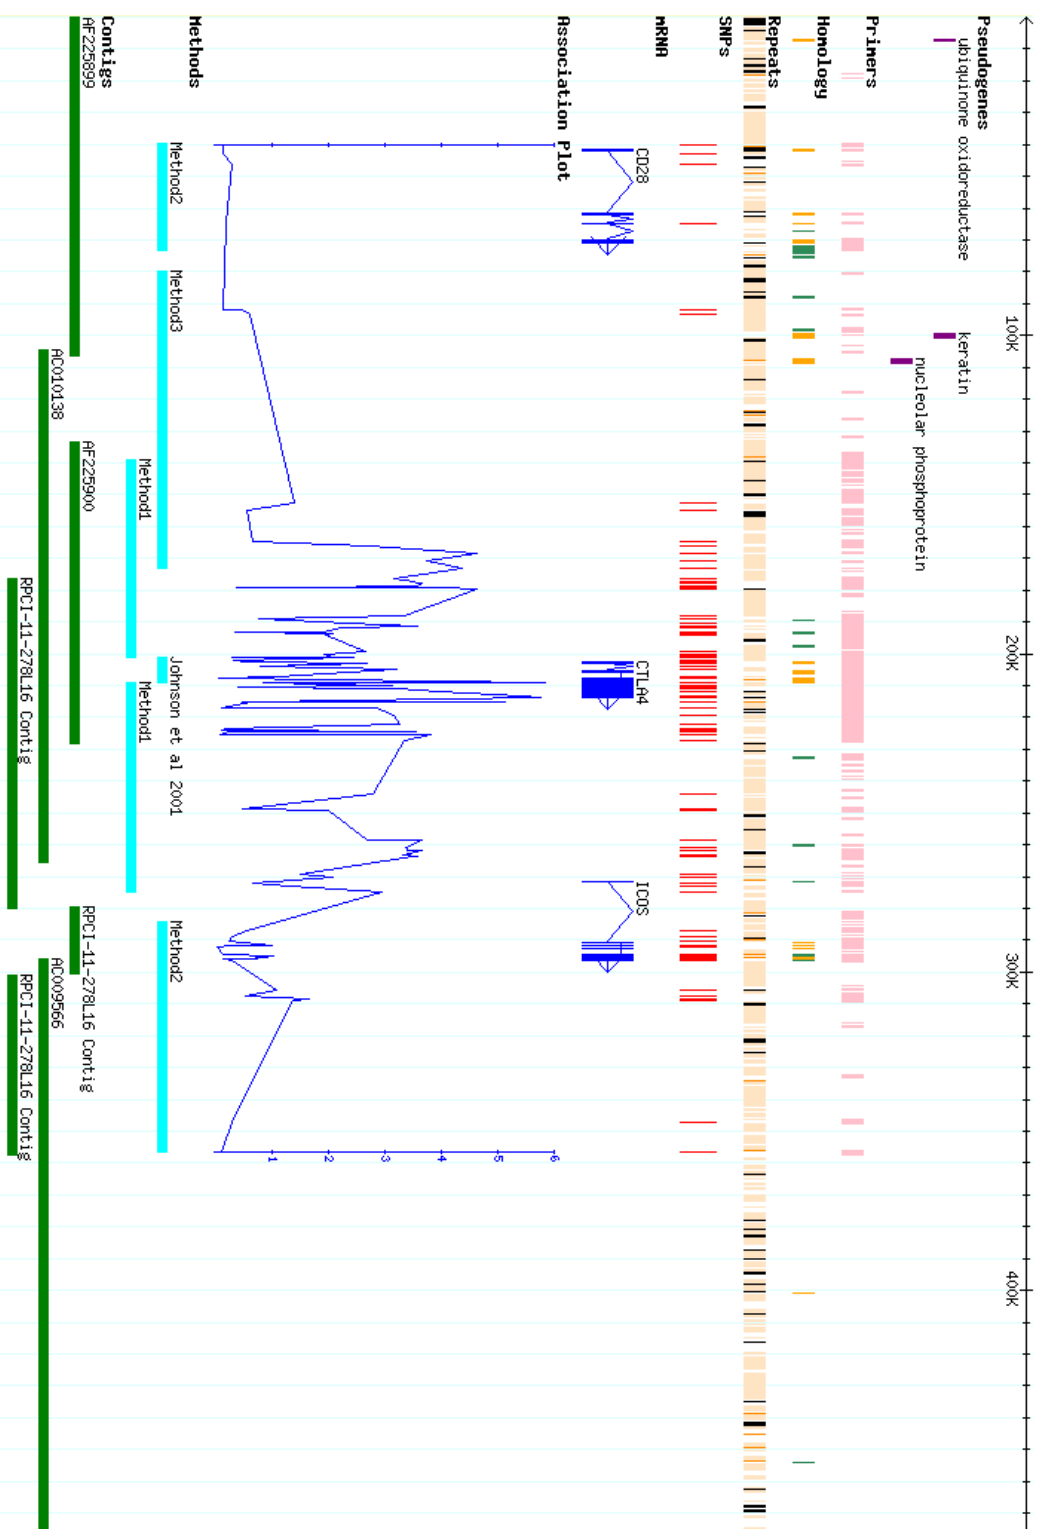

**Figure A2.** Overview of chromosome 2q33. The relative positions of genes and pseudogenes are shown, along with primers used for sequencing, homologies to dbEST and vertebrate mRNA sequences from EMBL, repeats detected by RepeatMasker, and SNPs confirmed by genotyping. An association curve (scale  $-\log P$ ) for the markers studied (see Supplementary Information B) and contigs used in the analysis are also shown. The Methods track indicates the methods used in SNP detection.





## SNP identification

The scanned region and the three SNP identification methods used, are shown in Figure A2. PCR products from 32 individuals (the parents of eight probands from UK T1D families, and eight male and eight female control subjects) were scanned, using denaturing HPLC (Transgenomic Inc., Santa Clara, CA). Primers sets (136 in total) were designed for PCR products (500 - 600 bp) using Primer3 ([http://www-genome.wi.mit.edu/cgi-bin/primer/primer3\\_www.cgi](http://www-genome.wi.mit.edu/cgi-bin/primer/primer3_www.cgi)), and amplified in each of the 32 individuals and the products analysed according to Transgenomic Application Note 101. Samples with heteroduplex or different homoduplex patterns were then directly sequenced using the same PCR primers (Method 1). Direct sequencing of PCR products from 32 individuals was performed using an Applied Biosystems (ABI) 3700 capillary sequencer (Foster City, CA)(Method 2). For methods 1 and 2, the sequences from AF225900 and RPCI-11-278L16 were used for SNP harvesting. SNPs from the public database (dbSNP) were extracted (Method 3) (Table A2).

In total, more than 60% percent of the 317 kb sequence was scanned in 32 individuals for SNPs (Figure A2), excluding repeats sequences. All 28.6 kb of the CTLA-4 gene and its flanking DNA from 3.5 kb upstream of 5' UTR to 19 kb downstream of the published 3' UTR was contiguously scanned/re-sequenced. For *CD28* 7.7 kb was sequenced. This corresponds to 2.1 kb upstream of 5' UTR, all four exons, and 2.6 kb downstream of 3' UTR. For *ICOS*, SNPs were harvested from 13.9 kb corresponding to 2.7 kb upstream of the 5' UTR, the 5 exons, and all 3' UTR sequence. All the identified SNPs were mapped using the golden path sequence (NCBI build 28) and the information stored in our database. SNP coverage, and SNP positions are shown (Figure A2). Attempts were made to produce a denser SNP map between positions 100 kb and 150 kb using the public databases. No additional SNPs

were found. This may be due to the repetitive nature of this region. In total 108 SNPs were identified and/or confirmed.

All the supporting information, including SNP sequences, shown in Table A3 is also available from our ftp site (<ftp://ftp-gene.cimr.cam.ac.uk/CTLA4>).

**Table A2:** The names of re-sequenced SNPs in dbSNP

| dbSNP identifiers | confirmed/genotyped |
|-------------------|---------------------|
| rs1879877         | Yes                 |
| rs1181390         | Yes                 |
| rs1181389         | -                   |
| rs1181388         | Yes                 |
| rs1980421         | -                   |
| rs1980422         | -                   |
| rs1181425         | Yes                 |
| rs1181426         | -                   |
| rs875020          | -                   |
| rs179584          | -                   |
| rs1974996         | -                   |
| rs231387          | -                   |
| rs749933          | -                   |
| rs890637          | -                   |
| rs1035846         | -                   |
| rs231813          | -                   |
| rs231815          | -                   |
| rs231817          | -                   |
| rs231736          | -                   |
| rs1863800         | Yes                 |

**Table A3:** Sequences of 108 SNPs

| SNP names    | SNP sequences                                                                                                             |
|--------------|---------------------------------------------------------------------------------------------------------------------------|
| 1 CD28p5_1Rb | AATATTAGCAGTGTTTATATTAGGGTG[T/G]TAAGAATGTGGATGAATCTTGTTTTAA<br>T                                                          |
| 2rs1879877   | CTGGTGGAATAACCCCTCTCT[T/G]CAAAGGGCCTGGGAGTTGAAGAAGGGTG                                                                    |
| 3rs1181390   | TGGAGTAAGATGCTCATTCAAC[T/G]TGTTCAGAGTTAGAAAAAGGCC                                                                         |
| 4rs1181388   | AGGTAACCCAGGCCCCACAGA[G/A]AGGTGGTTGCATGCAAGTGTCTA                                                                         |
| 5CD28ex3F    | TTTATTATTTCTGGGTAAGAGAAGCAGCAC[T/C]GCTTTTATGTAACTTTCCACTG<br>CATGGTTCAATCTTGGTAGGTTGT[G/A]TGATCTAGGAATTTATTCATTTATTCTAG   |
| 6rs1181425   | TTTT                                                                                                                      |
| 7rs1181425V  | TTTTTCATCTCTGATTATATTTATTTGG[A/G]TCTTCTCTCTTTTCTTCTTA<br>GGCGTGAGCCACCACGCCTGGC[A/C]TGGATTTTTAAAAATTATTTCAATCTCCTTG<br>TT |
| 8rs1181426V  | TT                                                                                                                        |
| 9CTAF185     | TAGTAGGTTTCTGGGGATGAG[T/G]TCAAGGAATAAGAGGGGTCACTGACA<br>CTCCGCCATCCACACTCCCAGGGTCTG[T/C]GGTGAAATCGAATTTATTCTCATTCT        |
| 10CTAF212    | C                                                                                                                         |
| 11CTAF305    | AGGAGCTATTTTAATTTTCATGCAATGT[C/T]TCTGTAGGGTTCAGTTGGCGTTGT                                                                 |

12CTAF322 AGTATCTACCGTGTCTTAATAT[T/C]GTATCCAATTGGAATTTGATATAAACT  
TGGGAGTATTTTACTGTGCTAAAA[T/C]ACATTTAGCATGGGCTGTTATATCTTATGA  
13CTAF343 C  
14CTAF371\_1 CAATACTAACACAGATAGG[T/G]GTATCGTAGCAGAGTCCTGATTGTGCGCC  
15rs1863800 GATAAAAAGGAACTGTTTAAA[C/T]TGATAGTAAAGAAAAGCCTTAAATTTTTGG  
16CTAF422 GTTCTATGGTTAAGAATCCGTAAGCATCA[G/A]GTCCTTTATTTTGCATCTCTGGGG  
17CTAF434\_2 TCATTTAATTCATTACCCATATACTAC[G/A]TATGGGCATATAAATACCTGCTTT  
18CTAF439-1 CAGGACCAAACAAAACACTGAA[T/C]AGGAACTCAAGTCACTCAAGTAACTT  
19CTAF439-2 CTTTGCTTCAAGACTCTCTTCT[C/G]TTTTATAGATGTAATCCACTCACCTCA  
20CTAF450\_1 GTTTAACCTTTTAGGAGGGTTTTGTTG[T/C]TGCCTTATAGAAGCTAACATAAG  
21CTAF450\_2 GCCAAAAGAAAAGAAATGCAAAG[A/C]GGGCAGACAAAGAAAAA  
22CTAF450\_3 GAAAAAAAAAAAAAAAAACAC[G/A]TGAATGTAAAGCTATGCCACTTTTT  
23CTAF450\_4 AATGTAAAGCTATGCCACTTTTTTT[T/A]CCCCTCTCATAGGTAATCTCGAA  
24MH30 AATAAAACAGAATAAAACAAT[G/C]AGAAAATTTTACCTTTATTTAATTAGCAGA  
25MH26 CCCACTGACTCTGTCTCAAGAT[G/T]GTAATTAGTAACTGACAATGATTACGC  
26MH23 TATCTAAGACTTGGATTCACTG[C/A]ATTTACATCGCTGAGCTCTCACAT  
27MH20 TAGTCTGCCTGACATGCTT[G/A]GTGTATCTTGTATGATTTCTGTAAAGTTAGAA  
AAAATTGTTGAGAGTTGAAAGTAAAGAGA[T/C]CCTTCTAATAGTGCCTTCTTATCTC  
28MH18 T  
29MH17 CAATTTTATTTGCTAAATTTAGTAC[T/C]AGAGTGACATTATCTGTACATT  
30MH15 TGCATACAGAACTGAGCTCTATGC[G/T]TGTCAGACAAAACCAAAGAGCTT  
31MH14 CTGGCTGGTGATGGTTCAGTGT[G/A]ATGTGGGATCAGAATTGCAGATTAT  
32MH13\_2 ACCCGAAAAGGAAATCTCATACT[T/C]GCCAAGCAGTCATTCCCCATTTTCC  
33MH13\_1 CCTTCATTCTTTTTATGGCT[G/A]AATAATATTCCGTGGTGTAGATAG  
34MH3 AATTAAGGAATCTGGTAAGA[T/C]GTCTTTGAAAGTTCTAATTACAAC  
35MH2 ATTTCTTCTTTATAAAATGGGAAAAATG[G/A]TAACTCTTGTCTGTAGGGTTGTTA  
36MH1 AGTAGTGGCAACAGAGACCC[C/T]ACCGTTTGCAAATCATAACATATTTACT  
37CT50 GCTCCTCTACATAAATACTTCAA[T/C]TCCAGCATTGATCTCACTCTATCATGATCA  
38CT51 CTCTATCATGATCATGGGTTTAGCTG[T/C]CTGTCCCTGCCACTGCTGTGTGT  
39CT52 CAGGAACATTTGTTTTTCACTTTTT[A/G]AAAAACCTCTGTTGCCAGTCT  
40CT53 GTTGGCGCTTGAGCTGGGGCTTGAAG[G/A]TTTCTATAATGTGTAGCAGTGTAT  
41CT41 AAAACCAGAGGCAGCTTCTTTT[C/T]GCCTATTTTCACTTTATTTCTTGTGAT  
CT44 (-  
42319C>T) TCCACTTAGTTATCCAGATCCT[C/T]AAAAGTGAACATGAAGCTTCAGT  
43+49G>A GGCACAAGGCTCAGCTGAACCTGGCT[G/A]CCAGGACCTGGCCCTGCACT  
44CT43 TATCTCTCTAGACCTTCTTGG[C/T]TAAGAAACCATGTAGTTTGTATGA  
45CT55 GCAGCCACTATTTTTGAGTTGATGCAAG[T/C]CTCTCTGTATGGAGAGCTGGTCTCC  
46CT57 GACAGTCCCTCTCAGACA[C/A]CTCTGCCTAAGGCCAGCTTTGCCATTGCA  
47CT59 GTTTATAATTCTGTATGCTGTGA[A/G]CATTCAATTTTAAACCAGTAGGGACC  
48CT60 TTTTGATTTCTTACCCTATTTGGGATATAAC[G/A]TGGGTTAACACAGACATA  
49CT61 TGGGTTAACACAGACATA[G/A]CAGTCCCTTATAAATCAATTGGCATGCTGT  
50JO37\_3 TGGTAGCCATGAAGAAAAACCAATC[G/A]GGAGCCTCAGTGGATA  
51JO37\_2 GTATATCATTTTCACTCCTCTAAAC[G/A]TCTTTAGAGAGATTACTCTTTTTCATAGTT  
52JO37\_1 GGGAGTGCATCTGGGCACCA[A/C]ATGAAAGCCTCTTCTAATTTCCATGTCA  
53JO36 GTCAGATTTGCTGACACTTTAAGCTC[A/G]TGGATTTCTCCTTTTTGTTTCATAG  
54JO35 TAGGACATCCAGGACCGTTTT[T/C]CATAACAGAACCCATCTGTG  
55JO34 CTACATGCTGGGATAGGGGCTCAT[A/G]GTAAGTTTGCCAGATTCAACCAA  
56JO31 AACAGTCTGTGACGAAAGCC[G/T]GCAGTACACTGAGAAAGCTCCTATT  
57JO30 CGGACCTCTTGAGGTGAGGATTC[G/A]AGACCAGCCTGGCCAACATGGTGA  
58JO27\_2 CAGGGCCTGAAGATGCCCC[C/G]AAATGGCAAATTAAGTGAAGTGG  
59JO27\_1 CCAGAAGTTGAAGTGTAGGAA[T/C]ATCTGGGGTCAAAGCAAAAAAGACTTT  
60JO26\_2 GTGTGTGGTGTGTGTGTGGGCAC[C/T]AAGCAGGGGTGAAAGCTGATTATGGAGG  
61JO26\_1 GGTGAAAGCTGATTATGGAGGGG[T/C]GGTGTGAGGAAACATCACAAGG  
62JO23 AATGAGAGAGTGTACCAT[A/G]TTTGTCTACCCAAACCTTTAAAGA  
63JO22 AATGTTGTACCCTTACGACA[T/C]TGGCATGAGCTCAGGTGGCAGGAGAACAA

64JO18 CTTTTACCTTTTCTTTATTTTCCCGTCAG[T/C]AAATATTTGTTAGGCAAATAAGAGCC  
65JO13 TGGCAAATCTGGTCACCACAA[T/C]ACTCTTTAAAAAACACGCTCATGTTATT  
66JO10 CTCCCAGAGTTTGCCTGTCCAAG[G/T]AATTCAGGGGAAAACGATGGTGGGCTC  
67JO9 CATGTAATTAGCCTACTGGCTCTA[C/G]AATAGTCATGATATATCCATTA  
68JO8\_2 AGAAAGACCCAAACCCACTTTTATACCAAACCCAC[T/C]CTTGTGATAACAAA  
69JO8\_1 TTGTGATAACAAAC[T/C]CACTCCTGTCTAATGACAGAGCCCTCATGACCT  
70JO6\_2 CTAACAATCTGAAATGTGAAA[T/C]TATCTCRCTTTCACACAAGAAG  
71JO6\_1 CAATCTGAAATGTGAAAYTATCTC[A/G]CTTTCACACAAGAAGAGATGTAGAA  
72JO3 AATATTAACCCCTCAACAAC[C/A]GTAATGGATATAAACGCATGTGCTCATCA  
73CTBC358 GAAGGTGGTGCTCAGAGCAG[G/T]CTGCTTCCCTGCCAGGGTTATAGTCC  
74CTBC313 CTCAGTTTCAGAAATGTCTCT[C/T]ATAGAAGCCCCTAGGAAAACAAGCCT  
75CTBC305 TCTGGTTTGCCTAATTTATGC[C/T]TTTGAAGGCTGATATTATTGCATT  
76CTBC217\_2 ATTTCTTTCTGGATATTGAAA[A/C]CAATAGGGGTAGTYCTTCCTTC  
77CTBC217\_1 GAAAAMCAATAGGGGTAGTG[C/T]CTTCTTCTAACCTCAGGGGATCCCTCAG  
78CTBC190 GCAGCTATGTTTCAGATGTAATT[T/C]TGTTTCCACCAATCAGATGTGCCGAT  
79CTBC182\_2 ACACTTCAGTGCATCTCTAATTT[G/T]GGAAATGATCAATGGTCAACAGAG  
80CTBC182\_1 TAGTAGTTTTTACAATTGTATT[C/T]ATTAGGCACAGGAAAATGTAACTCAG  
81CTBC165\_3 AAGGGCTGGAGAAGCAGATT[A/C]TTGGGCTTAGCTTCTAGAAAATA  
82CTBC165\_2 AGTTCCAAAAGCAAGTGAGGTATTGGCA[C/T]ATCTGATTGGTGGAAACAAAATTA  
83CTBC165\_1 ACAAATTACATCTGAATTTTGTGTT[G/T]CTGAATTGCTACATGGGCATAGG  
84CTBC106 TTCTTGACCAAGATTTTTGAGAAGG[C/T]GAGGCATGGGAAGGATCATTG  
85CTBC099 GGGGAAGCTTCAGCAGCTAGG[G/A]GGATCCCTGCAGGATCAGCCT  
86CTBC078 CATTTGGACTGGGAATTCCTT[C/T]CTGTGGTAGAAAATAAAATG  
87CTBC073 TTAAGTGCAGTTAAGAGGA[T/C]TGAGGAATGTAGAATGAGCACAAG  
88CTBC053 GAAGTCTGTGAAGATGACTGACC[T/C]TGGAGCCCCTCTTAGCCTCTCCAC  
89CIIC065 AAAGCAACAGTGGGGCAACATATTTT[C/A]CTGTGACACAAATAAAGCCC  
90IC082R ATGAAAATTTGTCATATTAATAAAG[G/A]AAAATAAAAACAAAAGAA  
91CTIC098 TGCTCCAATATGAAAGCTAC[C/T]AAAGGACAGAGGCCATACCAGTTT  
92CTIC114\_1 GACCAACAGGGAGACAATT[C/T]CTTCCCCSAAGACATACCTACTAAT  
93CTIC114\_2 CCAACAGGGAGACAATTYCTTCCCC[C/G]AAGACATACCTACTAATTAAC  
94CTIC114\_3 ATTTTTAAAAAATTATTATGC[A/G]TGGGCTGCGAATTTGAATCCAAGTTCTGTA  
95CTIC142\_1 TGTAGGGAACTGGCACATGGAGAGCATTTAGA[T/G]AATTTATGCTGAATTTTGTTC  
96CTIC142\_2 C  
97CTIC142\_3 GATGTGACCCTATAAT[A/C]TGGAACCTCTGGCACCCAGGCATG  
98CTIC148 AAACAAACACATTTACAA[G/A]AAAAATGTTTTAAAGATGCCAGGGGTACT  
99CTIC154\_1 AGTTAAATGGTTTACTTTGTTCA[A/T]GTTAGTGGTAGGAAACATTGCC  
100CTIC154\_2 TCTTTAATGGGCCAGCATTCT[C/T]ATGGGGTAGAGCAGAATATTC  
101CTIC154\_3 GAATCACAGTGGTCTACCTGC[A/G]TTCATAATTCCAGGATCTGTGAA  
102CTIC159 TGGCTAGAAAGATTCTTAAATAT[G/A]TGAATATGATTATTCTTAGCTGGAATATTT  
103JC034sR TGTGTGTGGGGTGGGGTATGGGGAGGA[G/C]AACCTTCATGGTGGCCACCTGG  
104JC058sR CATTCAAAGAAATGATGGTCC[G/A]TCAGAAATACATTTAACTGAG  
105JC068sFa ATGGTATATGTTAAATGCT[G/A]TGGTGTCTGAATTTATTTCTAGCAACA  
106JC068sRb ATCCCTAAATATTCAATCTCCT[C/G]TCTTATCTCCATCTTCTCTA  
107JC473sR\_4 CTGCAACTCCAGCAGGTAATACTG[C/G]TTACCTAACCAATTGTGGTATGG  
108JC569sF GTTTTCTAGAAATTGATT[C/A]ATTAACAACCTACTGGGGTTTTAAAG  
GTAACAAGGAAAACCTCTACAGGGTGG[G/A]ATTGAGATATTGGATCTTGATTA

## **DNA preparation**

For cell-line samples, DNA was extracted from Epstein-Barr virus (EBV)-transformed peripheral blood lymphocytes. One hundred ml of confluent EBV cells were pelleted at 1000 rpm for 5 min. The supernatant was discarded and cells were re-suspended in 3.5 ml of 6 M guanidine hydrochloride (Sigma, Dorset, UK), 250  $\mu$ l of 7.5 M ammonium acetate (VWR international Ltd, Lutterworth, UK), 50  $\mu$ l of Proteinase K (VWR international Ltd, Lutterworth, UK) and 250  $\mu$ l of 20% sodium N-laurylsarcosinate solution (Fluka, Dorset, UK). The solution was incubated overnight at 37 °C. The tubes were cooled to RT and then 2 ml of chloroform added. The samples were then mixed and spun at 2500 rpm for 3 min. The upper layer was removed and added to 10 ml of absolute ethanol. The tubes were chilled to -20°C overnight. The solution was gently inverted and the precipitated DNA pelleted at 3000 rpm for 15 min in an Allegra 6R micro-centrifuge (Beckman, High Wycombe, UK). Pellets were washed with 70% ethanol and re-suspended in 300  $\mu$ l TE (10 mM Tris, 0.1 mM EDTA; pH 7.5). DNA was quantified using PicoGreen dsDNA quantitation reagent (Molecular Probes Europe B.V., Leiden, The Netherlands) and diluted to 4 ng/ $\mu$ l in TE (pH 7.5) before use. For blood samples, whole blood was lysed using 30 ml of lysis buffer (0.3 M Sucrose, 1.0 M Tris-HCl, 4.9 M MgCl<sub>2</sub>, 1% Triton-X (Sigma, Dorset, UK)). DNA was extracted from the resultant white blood cell pellet using the method described above for cell-line samples.

## **Genotyping PCR**

PCR conditions were optimised by varying MgCl<sub>2</sub> concentrations between 1 and 5 mM and annealing temperature between 50 °C and 65 °C. PCRs were performed in 384 well polypropylene microtitre plates (ABgene, Epsom, Surrey, UK) in 6  $\mu$ l final

reaction volume. 3 µl of 4 ng/µl stock of genomic DNA was dispensed into each well. 3 µl of PCR reaction mix containing 0.4 mM dNTP, 2-10 mM MgCl<sub>2</sub>, 3.8 ng/µl forward and reverse primer, and 0.25 units of TaqGold (Applied Biosystems, Foster City, CA) was added and the plate was covered with Adhesive Sealing Sheet (ABgene, Epsom, Surrey, UK). Reactions were incubated at 95 °C for 15 min and then cycled for 35 cycles of 95 °C for 30 s, 50-65 °C for 30 s, 72 °C for 30 s, and finally incubated for 15 min at 72 °C on PCT225 thermocyclers (MJ Research, Watertown, MA) using heated lids. All pipetting steps for PCR preparation were performed with on a Beckman Multimek™ 96 robot (Beckman, High Wycombe, UK), dedicated to pre-PCR work.

### **Genotyping methods**

Apart from early RFLPs<sup>5</sup> all the genotyping on this project was performed using the Invader® genotyping method described previously<sup>6</sup>. Probe sets for each SNP were designed and synthesised by Third Wave Technologies, Inc (Madison, WI). For a uniplex dry-down plate Invader® assay, assays were prepared for each allele separately. In a 384-well format, PCR products were diluted 1:4 in distilled water. Aliquots of 3 µl were dispensed into two pre-prepared 384-well format Invader® Assay FRET detection plates (Third Wave Technologies, Inc. Madison, WI). Six microlitres of probe mix containing 1.3 µM allele specific probe, 0.13 µM Invader™ probe, and 7.5 mM MgCl<sub>2</sub> were added. All pipetting steps for this preparation were performed with a Beckman Multimek™ 96 robot. Plates were covered with Adhesive Sealing Sheet (ABgene, Epsom, Surrey, UK). Reactions were incubated at 95 °C for 5 min, and 65 °C for 10-80 min on MJ PCT225 thermocyclers. Fluorescence was measured directly at the end of incubation using a Cytofluor 4400 fluorescence

microtiter plate reader (Perkin Elmer Applied Biosystems, Foster City, CA), excitation 485/20, emission 530/25, and gain 50.

For a biplex dry-down plate Invader® assay, assays for both SNP alleles were performed at the same time. Final reaction concentrations of the allele-specific probes were 0.7 µM and the Invader™ probe was 0.07 µM. The probes were labelled either FAM or RED. Fluorescence was measured directly at the end of incubation using a Cytofluor 4400, excitation 485/20, emission 530/25 for FAM and excitation 560/20, emission 620/40 for RED. All pipetting steps were performed with a Beckman Multimek™ 96 robot.

The (AT)<sub>n</sub>-3' UTR microsatellite marker was genotyped using fluorescently-labelled primers as described elsewhere<sup>7</sup>.

### **Genotype concordance**

Genotyping concordance was assessed by double-typing a small number of key SNPs using either a second batch of biplex Invader® kit, or the Taqman MGB chemistry (Applied Biosystems Inc, Foster City, CA)<sup>8-9</sup>.

MH30, CT60 and JO31 were genotyped using both Taqman and Invader® in either UK T1D families, GD cases or controls by two scientists independently. The allelic differences were 0/632(0%) for MH30, 1/688 (0.037%) for CT60, 1/1,898 (0.053%) for JO31, in total, 2/5,218 (0.038%). CTAF371\_1 was genotyped using Taqman and biplex Invader® by the same scientist. No allelic difference was observed in 1,990 alleles. No typing difference was observed in 768 alleles for CTIC154\_1 comparing two different batches of biplex Invader® kits.

### **Genotype checks**

All the genotyping data was stored in our local MySQL database (<http://www.mysql.com>). This allows easy double scoring, error checking and data retrieval. Data manipulation errors are reduced to a minimum by employing automated approaches. All Invader® and Taqman data was scored twice independently.

**Case-control datasets** In the case-control datasets, genotyping data was checked for Hardy-Weinberg equilibrium (HWE) separately for the cases and controls. Markers and datasets showing deviation from HWE ( $0.01 < P < 0.05$ ) are presented in Table A4. Datasets, which showed deviation from HWE ( $P < 0.01$ ) were treated as genotyping errors, and were retyped. No data set used in analysis showed deviation from HWE ( $P < 0.01$ ). Of the 216 datasets (108 SNPs) typed in the Graves' cases and controls, 18 datasets are out of HWE ( $0.01 < P < 0.05$ ). No datasets were out of HWE in the large Graves' case-control dataset or in the AIH cases.

Since regression analyses are sensitive to the number of typed samples, we retyped SNPs if there were  $> 10\%$  genotyping failures in either the cases or controls. The percentages of genotype failures were as a result less than  $10\%$  in each case and control dataset used, except for rs1181426V cases ( $15.9\%$ ).

$D'$  (Ref)<sup>10</sup> and  $W_n$ (Ref)<sup>11</sup> were used as the measure of pairwise LD in the LD blocks, measured both in a moving window across the region and against the double-typed key frame markers, MH30 and CT60. If  $D'$  or  $W_n$  differed substantially between cases and controls between a pair of markers (and  $D' > 0.8$ ), we retyped the marker.



**Table A4:** Markers and datasets showing deviation from Hardy-Weinberg equilibrium

(a) Graves' cases and controls

| Marker    | Dataset  | <i>P</i> value |
|-----------|----------|----------------|
| MH13_1    | cases    | 0.028          |
| MH2       | cases    | 0.012          |
| MH1       | cases    | 0.034          |
| IC082R    | cases    | 0.033          |
| CTIC098   | cases    | 0.035          |
| CTIC159   | cases    | 0.028          |
| JC068sFa  | cases    | 0.046          |
| rs1879877 | controls | 0.022          |
| rs1181390 | controls | 0.044          |
| MH23      | controls | 0.032          |
| CT43      | controls | 0.028          |
| CT61      | controls | 0.041          |
| CTBC106   | controls | 0.025          |
| CTBC099   | controls | 0.017          |
| CTBC073   | controls | 0.011          |
| CTBC053   | controls | 0.012          |
| JC058sR   | controls | 0.033          |
| JC473sR_4 | controls | 0.021          |

(b) T1D families

|         |     |       |
|---------|-----|-------|
| CTAF343 | USA | 0.015 |
|---------|-----|-------|

**Family collections** All typing data on family collections, including the microsatellite marker (AT)<sub>n</sub> 3'UTR, were screened for Mendelian inconsistencies using PedCheck<sup>12</sup>. Families that consistently misinherit in > 3% of SNPs were marked in the database, and automatically excluded from analysis. The familial dataset was screened again for Mendelian inconsistencies in STATA (<http://www.stata.com>). The working hypothesis is that these give a measure of genotyping error, given we have already excluded "real" misinheritances. These apparent misinheritances were eliminated by re-typing or excluding a family from the analysis for that marker. Mendelian inconsistencies in the 3,671 T1D family dataset are tabulated in Table A5. There were

231 inconsistencies out of 41,406 informative transmissions (0.56%). Some families identified by STATA have been recently excluded as newly-identified consistently mis-inheriting families in our lab. The number of apparent offspring inconsistencies arising from genotyping errors is, therefore, less than 0.56%.

$D'$  and  $W_n$  values were calculated with two double-typed frame markers (MH30, CT60) and were used for LD pattern checking. If the datasets showed largely different  $D'$  or  $W_n$  values within each population, we re-typed the marker.

The familial genotyping data was also screened for HWE using parents only by population, grouped as UK (Warren I, Yorkshire, Belfast, South West and Bristol), Norway, Romania, USA and Finland. Only one of 41 datasets showed deviation from HWE in Graves' and T1D families (not shown).

**Table A5:** Apparent misinheritances in 3,671 T1D families

| SNP name  | Affected sibling |             |      | Unaffected      |             |      | Total % |
|-----------|------------------|-------------|------|-----------------|-------------|------|---------|
|           | Inconsistencies  | Informative | %    | Inconsistencies | Informative | %    |         |
| CTAF343   | 18               | 2321        | 0.78 | 5               | 1211        | 0.41 | 0.65%   |
| rs1863800 | 20               | 3282        | 0.61 | 10              | 1696        | 0.59 | 0.60%   |
| MH30      | 25               | 3647        | 0.69 | 20              | 2033        | 0.98 | 0.79%   |
| +49G>A    | 1                | 3434        | 0.03 | 2               | 1837        | 0.11 | 0.06%   |
| CT60      | 15               | 3824        | 0.39 | 11              | 2099        | 0.52 | 0.44%   |
| JO31      | 25               | 3290        | 0.76 | 15              | 1788        | 0.84 | 0.79%   |
| JO30      | 17               | 2994        | 0.57 | 8               | 1506        | 0.53 | 0.56%   |
| JO27_1    | 20               | 3177        | 0.63 | 9               | 1609        | 0.56 | 0.61%   |
| CTIC154   | 5                | 1084        | 0.46 | 5               | 574         | 0.87 | 0.60%   |
| Total     | 146              | 27053       | 0.54 | 85              | 14353       | 0.59 | 0.56%   |

### CTLA-4 gene expression

Primers and probes to detect human CTLA-4 and sCTLA-4 mRNAs were designed using Primer Express software (Applied Biosystems, Foster City, CA),  $\beta$ 2-microglobulin by use of Primer 3 program (Table A6). The mouse primer and probe sets are shown in Table A7. All the synthesised probes were labelled FAM and

TAMRA at the 5' and 3', respectively. All the sequences and the annealing temperatures used for the 3'UTR mapping are tabulated in Table A8. Figure A4 shows our transcription analysis results of human the CTLA-4 gene.

**Table A6:** Primers and probes for human Taqman assay

| <b>Target Gene</b>         | <b>Forward (5'-3')</b>           | <b>Reverse (5'-3')</b>             | <b>Probe (5'-3')</b>            |
|----------------------------|----------------------------------|------------------------------------|---------------------------------|
| fICTLA-4                   | ACCCAGATTTATGTAATTG<br>ATCCAGAA' | CCGAACTAACTGCTGCAAGG<br>A'         | CGTGCCCAGATTCTGACTTCCT<br>CCTCT |
| sCTLA-4                    | CATCTGCAAGGTGGAGCT<br>CAT        | GGCTTCTTTTCTTTAGCAATT<br>ACATAAATC | ACCGCCATACTACCTGGGCAT<br>AGGCA  |
| $\beta$ 2<br>microglobulin | TGCTCGCGCTACTCTCTCT              | TCCATTCTCTGCTGGATGAC               | CTGGAGGCTATCCAGCGTACT<br>CCAA   |

**Table A7:** Primers and probes for mouse Taqman assay

| <b>Target Gene</b>      | <b>Forward (5'-3')</b>    | <b>Reverse (5'-3')</b>          | <b>Probe (5'-3')</b>                 |
|-------------------------|---------------------------|---------------------------------|--------------------------------------|
| fICTLA-4                | ACTCATGTACCCACCGC<br>CATA | GGGCATGGTTCTGGATCAAT            | CATGGGCAACGGGACGCAGAT<br>TTAT        |
| sCTLA-4                 | ACCCACCGCCATACTTT<br>GTG  | AGGACTTCTTTTCTTTAGCA<br>ATGACAT | AATCTGCGTCCC GTTGCCCATG<br>C         |
| liCTLA-4                | GCCTTTTGTAGCCCTGCT<br>CA  | TCAGAATCCGGGCATGGTT             | TTCTTTTCATCCCAGTCTTCTCT<br>GAAGATCCA |
| $\beta$ 2 microglobulin | CCTGCAGAGTTAAGCAT<br>GCCA | TGATCACATGTCTCGATCCC<br>A       | TATGGCCGAGCCCAAGACCGT<br>CT          |

**Table A8:** Primers for the 3' UTR mapping

| <b>Forward (5'-3')</b>          | <b>Reverse (5'-3')</b>            | <b>PCR condition (annealing)</b> |
|---------------------------------|-----------------------------------|----------------------------------|
| GAGCTGGGATGTTTCTGTCA            | CTTAATTCCTTGACCCACATCA            | 55°C.                            |
| ATGAGTCAGCTTTGCACCAGC<br>CATTAC | GAGGTGAAGAACCTGTGTTAAACAG<br>CATG | TD 70°C →60°C                    |
| GAACCACTTGTCACAGGCAAG<br>ACTG   | GTCAGCAAATCTGACGGTGGAGGC          | TD 70°C →60°C                    |
| TGTGATTATCACCACTGTTGCT<br>GCT   | CTGTTAGTTGCTATAGTAACTTGACT<br>G   | 55°C                             |
| CTGCTTCCACCTTGTCATGTTA<br>GCCG  | GTAGAGACAGGGTTTCACCATGTTGG<br>C   | TD 70°C →65°C                    |
| CTGCTTCCACCTTGTCATGTTA<br>GCCG  | TCTCCTGCCTCAGCCACCCGAGTAGC<br>G   | TD 70°C →65°C                    |
| CATAGTCTCTACTCTCCTGTGA<br>GC    | ATGGAGATGATGGCAGAACCTC            | 55°C.                            |

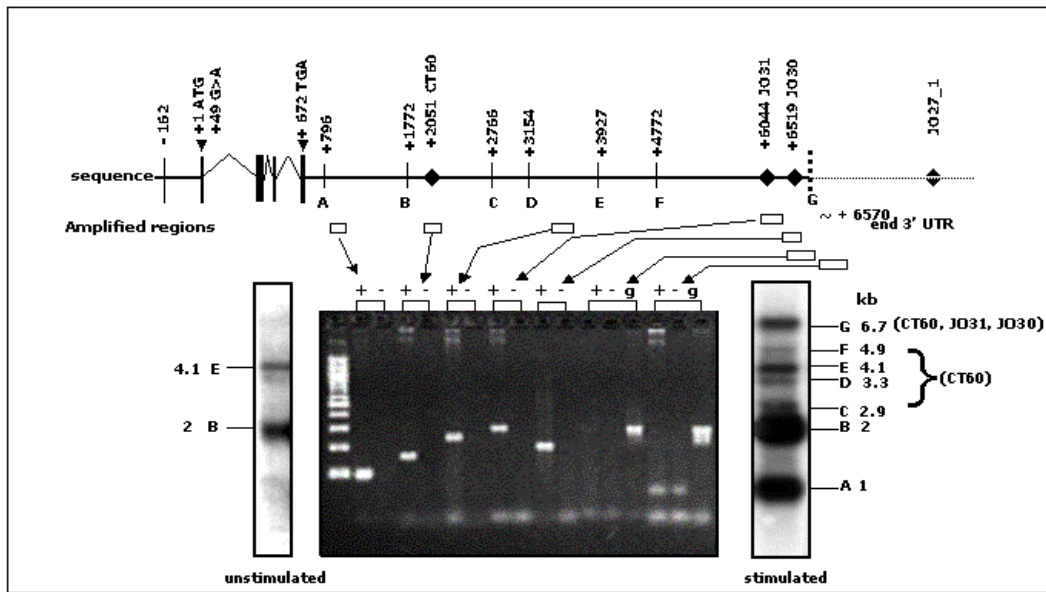

Figure A4: Transcription of the human CTLA-4 gene. Seven different sets of primers, indicated by open boxes, were designed on the basis of the genomic sequence downstream the open reading frame of *CTLA4*. For each primer set both +RT (reverse transcriptase)(+) and –RT(-) PCR products are displayed. RT-PCR mapping placed the end of the 3'UTR 6.57 kb 3' the last codon of CTLA-4 and CT60, JO31 and JO30 inside the 3' UTR. Northern Blot of poly(A)<sup>+</sup> mRNA derived from unstimulated and 24 h stimulated PBMC show the presence of multiple transcripts of CTLA-4 due to the existence of different poly(A) signal (A-G) in the 3' UTR. JO31 and JO30 are only present in the long 6.7 kb transcript. All five of the 2.9-6.7 kb transcripts include CT60. Primer sequences are given in Table A8. With respect to the pattern of splicing since the disease-associated 6.1 kb region is only 279 bp 3' of the major polyadenylation poly(A) mRNA termination site of *CTLA4*, we propose that its allelic variation might affect termination of the transcript. Sequences 3' of the poly(A) site bind the protein complex that mediates transcription termination<sup>13-15</sup>. The termination

protein complex in turn binds to the proteins mediating splicing of the final exon in the highly orchestrated production of a mature transcript<sup>15</sup>. The pre-mRNA complex destined to form mature sCTLA-4 mRNA may be more stable when the protective allele contributes to the secondary structure or, alternatively, the splicing needed to produce the sCTLA-4 mRNA from the protective allele may be more efficient.

## References

1. Osoegawa, K. et al. A bacterial artificial chromosome library for sequencing the complete human genome. *Genome Res* **11**, 483-496 (2001).
2. Osoegawa, K. et al. Bacterial artificial chromosome libraries for mouse sequencing and functional analysis. *Genome Res* **10**, 116-128 (2000).
3. Durbin, R. & Thierry-Mieg, J. AC.elegans database. Documentation, code and data available from anonymous FTP servers at lirmm.limrmm.fr, cele.mrc-lbm.cam.ac.uk and ncbi.nlm.nih.gov. (1991).
4. Schwartz, S. et al. PipMaker--a web server for aligning two genomic DNA sequences. *Genome Res* **10**, 577-586 (2000).
5. Johnson, G. C. et al. Haplotype tagging for the identification of common disease genes. *Nat Genet* **29**, 233-237 (2001).
6. Mein, C. A. et al. Evaluation of single nucleotide polymorphism typing with Invader on PCR amplicons and its automation. *Genome Res* **10**, 330-343 (2000).
7. Nistico', L. et al. The CTLA-4 gene region of chromosome 2q33 is linked to, and associated with, type 1 diabetes. *Hum Mol Gen* **5**, 1075-1080 (1996).
8. User Bulletin: Primer Express Version 1.5 and TaqMan MGB Probes for Allelic Discrimination (<http://www.appliedbiosystem.com>)

9. Ranade, K. et al. High-Throughput Genotyping with Single Nucleotide Polymorphisms. *Genome Res.***11**,1262-1268 (2001)
10. Devlin, B. & Risch, N. A comparison of linkage disequilibrium measures for fine-scale mapping. *Genomics* **29**, 311-312 (1995).
11. Klitz, W., Stephens, J. C., Grote, M. & Carrington, M. Discordant patterns of linkage disequilibrium of the peptide- transporter loci within the HLA class II region. *Am J Hum Genet* **57**, 1436-1444 (1995).
12. O'Connell, J. R. & Weeks, D. E. PedCheck: a program for identification of genotype incompatibilities in linkage analysis. *Am J Hum Genet* **63**, 259-266 (1998).
13. Proudfoot, N. J., Furger, A. & Dye, M. J. Integrating mRNA processing with transcription. *Cell* **108**, 501-512 (2002).
14. Dye, M. J. & Proudfoot, N. J. Multiple transcript cleavage precedes polymerase release in termination by RNA polymerase II. *Cell* **105**, 669-681 (2001).
15. Cartegni, L., Chew, S. L. & Krainer, A. R. Listening to silence and understanding nonsense: exonic mutations that affect splicing. *Nat Rev Genet* **3**, 285-298 (2002).
